# Supplementary material for: De novo Prediction of Moonlighting Proteins Using Multimodal Deep Ensemble Learning
Source: PubMed Central journal article supplement (PMC8019903; doi:10.3389/fgene.2021.630379), 2021-03-22
Supplement: Data_Sheet_1.pdf [file Data_Sheet_1.pdf]

## *Supplementary Material*

### 1 Supplementary Data

#### 1.1 The hyperparameter selection experiments of sub-models using deep learning

The architecture of MEL-MP contains four sub-models and a stacked ensemble model. To improve overall predicting performance, the accuracy of the four sub-models should be as high as possible. Due to the deep learning model contains many of hyperparameters, they can significantly affect accuracy. Thus, we conducted a lot of experiments to select hyperparameters for three deep learning based sub-models, Seq-BiLSTM, AA-MLP, and SS-ARF. The criteria of evaluation contain accuracy, precision, recall, and f-score. We tested all of the deep learning models using the optimizer of Adam, Adadelta, and Momentum. The details of four sub-models are shown as follows:

#### Seq-BiLSTM

In bidirectional long short-term memory neural networks (BiLSTM) [1] model, we split the Seq vector into 5, 4, 8, 10, 20 segments as the time steps, the number of inputs refers the dimension of segments, which means the number of inputs is equal to the dimension of Seq divide by time steps. When using the momentum optimizer, we set the momentum = 0.9, using the same time steps and the number of input parameter, each evaluation criterion is slightly higher than the performance of other optimizers. When the time steps are chosen to 4, then any of the criteria is the best among using other parameters. The Seq-BiLSTM achieved better accuracy. The hyperparameter selection of BiLSTM model is shown in **Table S1**:

**Table S1.** The performance of BiLSTM model using different hyperparameters.

| Optimizer | Number of input | Time steps | Precision | Recall | F-score |
|-----------|-----------------|------------|-----------|--------|---------|
| Momentum  | 80              | 5          | 0.770     | 0.762  | 0.758   |
|           | 20              | 20         | 0.763     | 0.759  | 0.759   |
|           | 40              | 10         | 0.795     | 0.785  | 0.785   |
|           | 50              | 8          | 0.822     | 0.813  | 0.810   |
|           | 100             | 4          | 0.851     | 0.844  | 0.851   |
| Adam      | 80              | 5          | 0.751     | 0.738  | 0.737   |
|           | 20              | 20         | 0.743     | 0.734  | 0.732   |
|           | 40              | 10         | 0.795     | 0.792  | 0.788   |
|           | 50              | 8          | 0.820     | 0.815  | 0.814   |
|           | 100             | 4          | 0.822     | 0.815  | 0.814   |
| Adadelta  | 80              | 5          | 0.765     | 0.759  | 0.755   |
|           | 20              | 20         | 0.760     | 0.736  | 0.737   |
|           | 40              | 10         | 0.778     | 0.766  | 0.767   |
|           | 50              | 8          | 0.805     | 0.794  | 0.795   |
|           | 100             | 4          | 0.808     | 0.804  | 0.803   |

**AA-MLP**

In consideration of a neural network model of multi-Layer perceptron (MLP), we test the different layers and the different number of neurons in each layer under the above three optimizers. The highest accuracy occurs to 2 layers network, using adadelata optimizer, the number of neurons in each layer is 553, 276. The precision, recall, f-score is 0.861, 0.853, 0.853, respectively, which is not only the highest performance but also cost less time compared to 3 layers neural network. The hyperparameter selection experiments are shown in **Table S2**.

**Table S2.** The performance of MLP model using different hyperparameters.

| Optimizer | Architecture | Precision | Recall | F-score |
|-----------|--------------|-----------|--------|---------|
| Adadelata | 512-256      | 0.838     | 0.825  | 0.826   |
|           | 256-128      | 0.818     | 0.816  | 0.814   |
|           | 553-276      | 0.861     | 0.853  | 0.853   |
| Adam      | 512-256      | 0.857     | 0.846  | 0.845   |
|           | 256-128      | 0.841     | 0.832  | 0.830   |
|           | 553-276      | 0.861     | 0.848  | 0.848   |
| Momentum  | 512-256      | 0.850     | 0.839  | 0.838   |
|           | 256-128      | 0.831     | 0.823  | 0.820   |
|           | 553-276      | 0.814     | 0.806  | 0.804   |
| Adadelata | 553-276-138  | 0.846     | 0.834  | 0.835   |
|           | 512-256-128  | 0.854     | 0.839  | 0.839   |
|           | 256-128-64   | 0.827     | 0.820  | 0.820   |
| Adam      | 553-276-138  | 0.849     | 0.839  | 0.837   |
|           | 512-256-128  | 0.846     | 0.837  | 0.835   |
|           | 256-128-64   | 0.828     | 0.820  | 0.818   |
| Momentum  | 553-276-138  | 0.841     | 0.834  | 0.833   |
|           | 512-256-128  | 0.850     | 0.841  | 0.840   |
|           | 256-128-64   | 0.836     | 0.830  | 0.829   |

**SS-ARF**

The deep auto-encoder [2] contains the encoding layers and decoding layers, through the neural network is trained layer by layer, the middle layer has the high-level feature of input vectors. In the deep auto-encoder model, the number of encoding layers and decoding layers is the same. We test the architecture of 512-256-512, 256-128-256, and 512-256-128-256-128 neurons in each layer, the middle layer is the feature vector need to be classified. In this task, the deep autoencoder using the Adam optimizer, the architecture of 512-256-512 has the best ability of feature representation among others. Classified by random forest (RF), the precision, recall, F-score is 0.839, 0.837, 0.833, respectively. The hyperparameter selection experiments are shown in **Table S3**.

**Table S3.** The results of different hyperparameters of deep autoencoder in SS-ARF model.

| Optimizer | Architecture | Classifier | Precision | Recall | F-score |
|-----------|--------------|------------|-----------|--------|---------|
| Adadelta  | 256-128      | LR         | 0.764     | 0.762  | 0.760   |
|           |              | SVM        | 0.790     | 0.790  | 0.786   |
|           |              | RF         | 0.790     | 0.790  | 0.786   |
|           | 512-256      | LR         | 0.749     | 0.745  | 0.744   |
|           |              | SVM        | 0.792     | 0.790  | 0.787   |
|           |              | RF         | 0.792     | 0.790  | 0.787   |
|           | 512-256-128  | LR         | 0.756     | 0.752  | 0.752   |
|           |              | SVM        | 0.793     | 0.790  | 0.785   |
|           |              | RF         | 0.793     | 0.790  | 0.785   |
| Momentum  | 512-256-128  | LR         | 0.722     | 0.713  | 0.713   |
|           |              | SVM        | 0.757     | 0.759  | 0.749   |
|           |              | RF         | 0.757     | 0.759  | 0.749   |
|           | 256-128      | LR         | 0.769     | 0.757  | 0.758   |
|           |              | SVM        | 0.791     | 0.790  | 0.782   |
|           |              | RF         | 0.791     | 0.790  | 0.782   |
|           | 512-256      | LR         | 0.678     | 0.664  | 0.664   |
|           |              | SVM        | 0.763     | 0.750  | 0.726   |
|           |              | RF         | 0.763     | 0.750  | 0.726   |
| Adam      | 512-256      | LR         | 0.749     | 0.738  | 0.738   |
|           |              | SVM        | 0.797     | 0.792  | 0.787   |
|           |              | RF         | 0.839     | 0.837  | 0.833   |
|           | 256-128      | LR         | 0.703     | 0.696  | 0.695   |
|           |              | SVM        | 0.770     | 0.769  | 0.757   |
|           |              | RF         | 0.770     | 0.769  | 0.757   |
|           | 512-256-128  | LR         | 0.739     | 0.731  | 0.732   |
|           |              | SVM        | 0.783     | 0.781  | 0.771   |
|           |              | RF         | 0.783     | 0.781  | 0.771   |

## 1.2 The research on the MPs correlation to each of chromosome.

We counted the number of proteins on each chromosome, the number of MPs and the proportion (Ratio) of MPs. Shown in **Table S4**.

**Table S4.** The distribution of predicted MPs in each chromosome.

| Chromosome | Total numbers of proteins | Predicted moonlighting proteins | Ratio         |
|------------|---------------------------|---------------------------------|---------------|
| humchr01   | 2067                      | 687                             | 0.3324        |
| humchr02   | 1289                      | 498                             | 0.3863        |
| humchr03   | 1077                      | 364                             | 0.3380        |
| humchr04   | 765                       | 286                             | 0.3739        |
| humchr05   | 874                       | 332                             | 0.3799        |
| humchr06   | 1029                      | 358                             | 0.3479        |
| humchr07   | 1004                      | 374                             | 0.3725        |
| humchr08   | 702                       | 233                             | 0.3319        |
| humchr09   | 810                       | 267                             | 0.3296        |
| humchr10   | 749                       | 286                             | 0.3818        |
| humchr11   | 1331                      | 375                             | 0.2817        |
| humchr12   | 1033                      | 351                             | 0.3398        |
| humchr13   | 332                       | 116                             | 0.3494        |
| humchr14   | 727                       | 321                             | 0.4415        |
| humchr15   | 603                       | 194                             | 0.3217        |
| humchr16   | 841                       | 330                             | 0.3924        |
| humchr17   | 1170                      | 397                             | 0.3393        |
| humchr18   | 275                       | 103                             | 0.3745        |
| humchr19   | 1434                      | 578                             | 0.4031        |
| humchr20   | 550                       | 196                             | 0.3564        |
| humchr21   | 254                       | 99                              | 0.3898        |
| humchr22   | 502                       | 188                             | 0.3745        |
| humchr     | 844                       | 285                             | 0.3377        |
| humchry    | 47                        | 23                              | <b>0.4894</b> |

### 1.3 Biological evolution of predicted MP.

The phylostratum [3], which is clustering genes according to their age. The genetic age is ranging from 1 to 19. Domazet- Loso and Tautz collected 20259 genes and their genetic age in 2010. Thence, we converted the UNIPROT [4] ID of the 20354 human proteins we studied into gene ID. The all UNIPROT accession are associated with 16446 genes, the MPs are associated with 5849 genes, and the non-MPs is associated with 10597 genes. Shown in **Table S5**. Furthermore, we studied the enrichment of genes corresponding to MPs and non-MPs in each genetic age using the hypergeometric test (HGT) as follow:

$$P - value = 1 - \sum_{i=0}^{m-1} \frac{\binom{M}{i} \binom{N-M}{n-i}}{\binom{N}{n}}$$

Where  $N = 16446$ , which is the number of all associated genes of all UNIPROT accession. For predicted MPs, the  $M$  is 5849, which is the number of the associated genes of predicted MPs, the  $n$  is the number of genes corresponding to UNIPROT accession at various genetic ages. And the  $m$  refers to the number of genes corresponding to the predicted MPs. For predicted non-MPs, same as predicted MPs, the  $M$ ,  $m$  is the 10597 and the number of genes corresponding to the predicted non-MPs. Here, we select  $P - value$  less than 0.05 to determine whether each type of protein is enriched in a certain genetic age. The results are shown in **Table S6**.

**Table S5.** Distribution of genes mapped to MPs and non-MPs in genetic ages ranging from 1 to 19.

|                                | UNIPROT proteins | MPs  | non-MPs |
|--------------------------------|------------------|------|---------|
| Total number                   | 20354            | 7250 | 13104   |
| The number of associated genes | 16446            | 5849 | 10597   |

**Table S6.** The enrichment of genes corresponding to MPs and non-MPs in each genetic age.

| Phylostratum<br>(Genetic age) | Phylogenetic                          | Genes (MPs) P-value | Genes (nonMPs) P-value |
|-------------------------------|---------------------------------------|---------------------|------------------------|
| 1                             | Cellular org                          | 4.19E-221           | 1                      |
| 2                             | Eukaryota                             | 1                   | 3.74E-42               |
| 3                             | OpisthoKonta                          | 0.999999998         | 7.68E-10               |
| 4                             | Holozoa<br>(Metazoa+Allies)           | 0.999916369         | 4.79E-05               |
| 5                             | Metazoa                               | 0.991251145         | 0.006275               |
| 6                             | Eumetazoa                             | 1                   | 8.43E-88               |
| 7                             | Bilateria                             | 0.999993939         | 4.05E-06               |
| 8                             | Deuterotomia                          | 0.995322575         | 0.001385               |
| 9                             | Chordata                              | 0.98124205          | 0.011816               |
| 10                            | Olfactors (Craniata<br>+ Urochordata) | 0.863730931         | 0.06533                |
| 11                            | Craniata<br>(Vertebrata)              | 0.18506727          | 0.782261               |
| 12                            | Euteleostomi<br>(Osteichthyes)        | 0.999999946         | 2.87E-08               |
| 13                            | Tetrapoda                             | 0.62098177          | 0.28129                |
| 14                            | Amniota                               | 0.967770952         | 0.019367               |
| 15                            | Mammalia                              | 0.99406807          | 0.003528               |
| 16                            | Eutheria                              | 0.708605486         | 0.245547               |
| 17                            | Boreoeutheria                         | 0.65574872          | 0.251309               |
| 18                            | Euarchontoglires                      | 0.254609453         | 0.58014                |
| 19                            | Primates                              | 0.827765731         | 0.13163                |

#### 1.4 The diseases correlation of predicted MPs.

We also applied HGT to research the predicted MPs associated with various diseases in OMIM database. OMIM collected 114 type of disease. For each type of disease, we collect the correlated proteins in UNIPROT database. In our study, 2894 of UNIPROT proteins is corresponding to the OMIM database, 1112 of predicted MPs is corresponding to OMIM database. Therefore, the  $N$  and  $M$  is 2894 and 1112 respectively. Where  $n$  is the number of proteins in each disease,  $m$  is the number of predicted MPs in each disease. Finally, we calculated the  $P$  – *value* of MPs for each disease. If  $P$  – *value* < 0.05, means that MPs is significantly enriched in specific disease. The results are shown in **Table S7**.

**Table S7.** The number of predicted MPs corresponding to the diseases in OMIM database. If the P-value less than 0.05, means that MPs are enriched in the disease.

| Disease                                                                           | Proteins | Predicted MPs | P-value |
|-----------------------------------------------------------------------------------|----------|---------------|---------|
| MAPLE SYRUP URINE DISEASE                                                         | 5        | 5             | 0       |
| CREUTZFELDT-JAKOB DISEASE                                                         | 4        | 4             | 0       |
| CHARCOT-MARIE-TOOTH DISEASE, AXONAL, TYPE 2J                                      | 2        | 2             | 0       |
| THROMBOPHILIA DUE TO PROTEIN C DEFICIENCY, AUTOSOMAL DOMINANT                     | 2        | 2             | 0       |
| THROMBOPHILIA DUE TO PROTEIN S DEFICIENCY, AUTOSOMAL DOMINANT                     | 2        | 2             | 0       |
| AMYLOIDOSIS, HEREDITARY, TRANSTHYRETIN-RELATED                                    | 1        | 1             | 0       |
| CHANARIN-DORFMAN SYNDROME                                                         | 1        | 1             | 0       |
| CHARCOT-MARIE-TOOTH DISEASE, AXONAL, TYPE 2K                                      | 1        | 1             | 0       |
| CHARCOT-MARIE-TOOTH DISEASE, AXONAL, WITH VOCAL CORD PARESIS, AUTOSOMAL RECESSIVE | 1        | 1             | 0       |
| DARIER-WHITE DISEASE                                                              | 1        | 1             | 0       |
| GERSTMANN-STRAUSSLER DISEASE                                                      | 1        | 1             | 0       |
| IMMUNODYSREGULATION, POLYENDOCRINOPATHY, AND ENTEROPATHY, X-LINKED                | 1        | 1             | 0       |

|                                                               |      |     |        |
|---------------------------------------------------------------|------|-----|--------|
| NEUROPATHY, HEREDITARY SENSORY AND AUTONOMIC, TYPE IIA        | 1    | 1   | 0      |
| CENTRAL CORE DISEASE OF MUSCLE                                | 175  | 89  | 0.0002 |
| PROTEIN Z DEFICIENCY                                          | 1163 | 479 | 0.0055 |
| ALPHA-1-ANTITRYPSIN DEFICIENCY                                | 5    | 4   | 0.0083 |
| MENKES DISEASE                                                | 5    | 4   | 0.0083 |
| BRAIN SMALL VESSEL DISEASE 1 WITH OR WITHOUT OCULAR ANOMALIES | 7    | 5   | 0.0150 |
| CHARCOT-MARIE-TOOTH DISEASE, TYPE 4A                          | 11   | 7   | 0.0224 |
| PELIZAEUS-MERZBACHER DISEASE                                  | 6    | 4   | 0.0340 |
| MYOCLONIC EPILEPSY OF LAFORA                                  | 10   | 6   | 0.0437 |
| INFLAMMATORY BOWEL DISEASE 28, AUTOSOMAL RECESSIVE            | 3    | 2   | 0.0566 |
| NORRIE DISEASE                                                | 3    | 2   | 0.0566 |
| RHEUMATOID ARTHRITIS                                          | 92   | 42  | 0.0608 |
| PARKINSON DISEASE 6, AUTOSOMAL RECESSIVE EARLY-ONSET          | 17   | 9   | 0.0707 |
| GLYCOGEN STORAGE DISEASE II                                   | 37   | 18  | 0.0740 |
| GLYCOGEN STORAGE DISEASE III                                  | 37   | 18  | 0.0740 |
| GLYCOGEN STORAGE DISEASE V                                    | 37   | 18  | 0.0740 |
| PICK DISEASE OF BRAIN                                         | 15   | 8   | 0.0745 |
| GLYCOGEN STORAGE DISEASE VI                                   | 31   | 15  | 0.0927 |
| ALEXANDER DISEASE                                             | 45   | 21  | 0.0978 |



|                                                                   |     |    |        |
|-------------------------------------------------------------------|-----|----|--------|
| ALZHEIMER DISEASE 3                                               | 198 | 83 | 0.1309 |
| NEURODEGENERATION WITH BRAIN IRON ACCUMULATION<br>1               | 12  | 6  | 0.1314 |
| CHARCOT-MARIE-TOOTH DISEASE, DEMYELINATING, TYPE<br>1B            | 10  | 5  | 0.1407 |
| CHARCOT-MARIE-TOOTH DISEASE, AXONAL, TYPE 2F                      | 2   | 1  | 0.1476 |
| INFLAMMATORY BOWEL DISEASE 25, AUTOSOMAL<br>RECESSIVE             | 8   | 4  | 0.1499 |
| NIEMANN-PICK DISEASE, TYPE B                                      | 8   | 4  | 0.1499 |
| ALZHEIMER DISEASE                                                 | 202 | 84 | 0.1510 |
| ALZHEIMER DISEASE 2                                               | 200 | 83 | 0.1581 |
| HUNTINGTON DISEASE-LIKE 1                                         | 4   | 2  | 0.1614 |
| INFANTILE SIALIC ACID STORAGE DISEASE                             | 4   | 2  | 0.1614 |
| NIEMANN-PICK DISEASE, TYPE C1                                     | 4   | 2  | 0.1614 |
| THROMBOPHILIA DUE TO PROTEIN C DEFICIENCY,<br>AUTOSOMAL RECESSIVE | 4   | 2  | 0.1614 |
| HEMOGLOBIN H DISEASE                                              | 36  | 16 | 0.1784 |
| CHARCOT-MARIE-TOOTH DISEASE, DOMINANT<br>INTERMEDIATE B           | 16  | 7  | 0.2403 |
| CHARCOT-MARIE-TOOTH DISEASE, DOMINANT<br>INTERMEDIATE C           | 16  | 7  | 0.2403 |
| CHARCOT-MARIE-TOOTH DISEASE, DEMYELINATING, TYPE<br>1C            | 7   | 3  | 0.2597 |
| CHOLESTASIS, PROGRESSIVE FAMILIAL INTRAHEPATIC, 1                 | 7   | 3  | 0.2597 |
| FABRY DISEASE                                                     | 5   | 2  | 0.2905 |

|                                                                                                  |    |    |        |
|--------------------------------------------------------------------------------------------------|----|----|--------|
| PIGMENTED NODULAR ADRENOCORTICAL DISEASE, PRIMARY, 1                                             | 5  | 2  | 0.2905 |
| CHARCOT-MARIE-TOOTH DISEASE, AXONAL, TYPE 2L                                                     | 3  | 1  | 0.3294 |
| GRANULOMATOUS DISEASE, CHRONIC, AUTOSOMAL RECESSIVE, CYTOCHROME b-POSITIVE, TYPE I               | 3  | 1  | 0.3294 |
| GRANULOMATOUS DISEASE, CHRONIC, AUTOSOMAL RECESSIVE, CYTOCHROME b-POSITIVE, TYPE II              | 3  | 1  | 0.3294 |
| INCLUSION BODY MYOPATHY WITH EARLY-ONSET PAGET DISEASE WITH OR WITHOUT FRONTOTEMPORAL DEMENTIA 1 | 3  | 1  | 0.3294 |
| MACHADO-JOSEPH DISEASE                                                                           | 3  | 1  | 0.3294 |
| PEROXISOME BIOGENESIS DISORDER 1B                                                                | 3  | 1  | 0.3294 |
| TANGIER DISEASE                                                                                  | 3  | 1  | 0.3294 |
| ADRENOLEUKODYSTROPHY                                                                             | 25 | 10 | 0.3513 |
| GAUCHER DISEASE, TYPE I                                                                          | 18 | 7  | 0.3822 |
| GAUCHER DISEASE, TYPE II                                                                         | 18 | 7  | 0.3822 |
| GAUCHER DISEASE, TYPE III                                                                        | 18 | 7  | 0.3822 |
| CHARCOT-MARIE-TOOTH DISEASE, AXONAL, AUTOSOMAL DOMINANT, TYPE 2A2A                               | 1  | 0  | 0.3842 |
| CHARCOT-MARIE-TOOTH DISEASE, AXONAL, TYPE 2A1                                                    | 1  | 0  | 0.3842 |
| CHARCOT-MARIE-TOOTH DISEASE, AXONAL, TYPE 2B1                                                    | 1  | 0  | 0.3842 |
| CHARCOT-MARIE-TOOTH DISEASE, AXONAL, TYPE 2B2                                                    | 1  | 0  | 0.3842 |
| CHARCOT-MARIE-TOOTH DISEASE, TYPE 4B1                                                            | 1  | 0  | 0.3842 |
| CHARCOT-MARIE-TOOTH DISEASE, TYPE 4B2                                                            | 1  | 0  | 0.3842 |

|                                                     |    |    |        |
|-----------------------------------------------------|----|----|--------|
| CHARCOT-MARIE-TOOTH DISEASE, TYPE 4H                | 1  | 0  | 0.3842 |
| FARBER LIPOGRANULOMATOSIS                           | 1  | 0  | 0.3842 |
| GLYCOGEN STORAGE DISEASE IXa1                       | 1  | 0  | 0.3842 |
| GRANULOMATOUS DISEASE, CHRONIC, X-LINKED            | 1  | 0  | 0.3842 |
| LEGG-CALVE-PERTHES DISEASE                          | 1  | 0  | 0.3842 |
| MOWAT-WILSON SYNDROME                               | 1  | 0  | 0.3842 |
| PARKINSON DISEASE 19A, JUVENILE-ONSET               | 1  | 0  | 0.3842 |
| CEROID LIPOFUSCINOSIS, NEURONAL, 3                  | 26 | 10 | 0.4127 |
| MULTIPLE SCLEROSIS, SUSCEPTIBILITY TO               | 26 | 10 | 0.4127 |
| INTERVERTEBRAL DISC DISEASE                         | 6  | 2  | 0.4230 |
| CHARCOT-MARIE-TOOTH DISEASE, DEMYELINATING, TYPE 1A | 24 | 9  | 0.4472 |
| CEROID LIPOFUSCINOSIS, NEURONAL, 1                  | 27 | 10 | 0.4741 |
| SURFACTANT METABOLISM DYSFUNCTION, PULMONARY, 1     | 9  | 3  | 0.4777 |
| SURFACTANT METABOLISM DYSFUNCTION, PULMONARY, 2     | 9  | 3  | 0.4777 |
| TAY-SACHS DISEASE                                   | 4  | 1  | 0.4975 |
| INFLAMMATORY BOWEL DISEASE (CROHN DISEASE) 10       | 20 | 7  | 0.5267 |
| INFLAMMATORY BOWEL DISEASE (CROHN DISEASE) 1        | 21 | 7  | 0.5944 |
| AMYOTROPHIC LATERAL SCLEROSIS 1                     | 96 | 35 | 0.6136 |
| CHYLOMICRON RETENTION DISEASE                       | 2  | 0  | 0.6209 |
| DANON DISEASE                                       | 2  | 0  | 0.6209 |

|                                                                |      |     |        |
|----------------------------------------------------------------|------|-----|--------|
| GAUCHER DISEASE, ATYPICAL, DUE TO SAPOSIN C DEFICIENCY         | 2    | 0   | 0.6209 |
| GLYCOGEN STORAGE DISEASE Ia                                    | 2    | 0   | 0.6209 |
| PSEUDOHYPOPARATHYROIDISM, TYPE IA                              | 2    | 0   | 0.6209 |
| FRONTOTEMPORAL DEMENTIA AND_OR AMYOTROPHIC LATERAL SCLEROSIS 1 | 8    | 2   | 0.6511 |
| VON WILLEBRAND DISEASE, TYPE 1                                 | 20   | 6   | 0.7026 |
| VON WILLEBRAND DISEASE, TYPE 2                                 | 20   | 6   | 0.7026 |
| VON WILLEBRAND DISEASE, TYPE 3                                 | 20   | 6   | 0.7026 |
| MYOTONIC DYSTROPHY 1                                           | 29   | 9   | 0.7324 |
| POLYCYSTIC LIVER DISEASE 2 WITH OR WITHOUT KIDNEY CYSTS        | 12   | 3   | 0.7401 |
| HIRSCHSPRUNG DISEASE, SUSCEPTIBILITY TO, 1                     | 6    | 1   | 0.7417 |
| GLYCOGEN STORAGE DISEASE Ic                                    | 3    | 0   | 0.7667 |
| PARKINSON DISEASE 1, AUTOSOMAL DOMINANT                        | 19   | 5   | 0.8011 |
| PARKINSON DISEASE 2, AUTOSOMAL RECESSIVE JUVENILE              | 7    | 1   | 0.8202 |
| REFSUM DISEASE, CLASSIC                                        | 14   | 3   | 0.8501 |
| AUTOIMMUNE DISEASE, SUSCEPTIBILITY TO, 1                       | 56   | 17  | 0.8681 |
| WILSON DISEASE                                                 | 1451 | 542 | 0.8748 |
| SANDHOFF DISEASE                                               | 8    | 1   | 0.8765 |
| DEMENTIA, LEWY BODY                                            | 15   | 3   | 0.8884 |
| FRONTOTEMPORAL DEMENTIA                                        | 34   | 9   | 0.8988 |

|                                                                      |    |    |        |
|----------------------------------------------------------------------|----|----|--------|
| POLYCYSTIC KIDNEY DISEASE 4 WITH OR WITHOUT POLYCYSTIC LIVER DISEASE | 29 | 7  | 0.9218 |
| SPINAL MUSCULAR ATROPHY, TYPE I                                      | 51 | 14 | 0.9328 |
| POLYCYSTIC KIDNEY DISEASE 1 WITH OR WITHOUT POLYCYSTIC LIVER DISEASE | 30 | 7  | 0.9390 |
| POLYCYSTIC KIDNEY DISEASE 2 WITH OR WITHOUT POLYCYSTIC LIVER DISEASE | 30 | 7  | 0.9390 |
| POLYCYSTIC KIDNEY DISEASE 3 WITH OR WITHOUT POLYCYSTIC LIVER DISEASE | 30 | 7  | 0.9390 |
| SPINOCEREBELLAR ATAXIA 17                                            | 55 | 14 | 0.9707 |
| HUNTINGTON DISEASE                                                   | 46 | 11 | 0.9731 |
| PARKINSON DISEASE, LATE-ONSET                                        | 16 | 2  | 0.9756 |

### 1.5 Functional description of predicted MPs and predicted non-MPs.

Toppcluster is a powerful tool for researching the enrichment of gene list. Here, we use Toppcluster to analysis the functional description of MPs and non-MPs. The pathway and gene family are exhibited in our experiments. Shown in **Table S8** and **Table S9**.

**Table S8.** The pathway analysis of predicted MPs and predicted non-MPs.

| MPs or non-MPs | Pathway                                                        |
|----------------|----------------------------------------------------------------|
| MPs            | Corticotropin releasing factor receptor signaling pathway      |
| MPs            | Glyoxylate metabolism and glycine degradation                  |
| MPs            | Glutathione conjugation                                        |
| MPs            | Degradation of beta-catenin by the destruction complex         |
| MPs            | Influenza Viral RNA Transcription and Replication              |
| MPs            | Signaling by FGFR2                                             |
| MPs            | Glucose metabolism                                             |
| MPs            | Nonsense-Mediated Decay (NMD)                                  |
| MPs            | Antigen processing-Cross presentation                          |
| MPs            | Arginine biosynthesis                                          |
| MPs            | Hh mutants abrogate ligand secretion                           |
| MPs            | Regulation of p38-alpha and p38-beta                           |
| MPs            | Formation of tubulin folding intermediates by CCT/TriC         |
| MPs            | Dectin-1 mediated noncanonical NF-kB signaling                 |
| MPs            | Eukaryotic Translation Termination                             |
| MPs            | AUF1 (hnRNP D0) binds and destabilizes mRNA                    |
| MPs            | The citric acid (TCA) cycle and respiratory electron transport |
| MPs            | The role of GTSE1 in G2/M progression after G2 checkpoint      |
| MPs            | Glycolysis                                                     |
| MPs            | MAP00561 Glycerolipid metabolism                               |
| MPs            | Mitochondrial translation elongation                           |
| MPs            | Biosynthesis of amino acids                                    |
| MPs            | Glycolysis / Gluconeogenesis                                   |
| MPs            | valine degradation                                             |
| MPs            | Phase 1 - Functionalization of compounds                       |
| MPs            | Pyrimidine metabolism                                          |
| MPs            | Histidine metabolism                                           |
| MPs            | Cap-dependent Translation Initiation                           |
| MPs            | Metabolism of amino acids and derivatives                      |
| MPs            | MAPKinase Signaling Pathway                                    |
| MPs            | APC/C:Cdc20 mediated degradation of Securin                    |
| MPs            | MAP kinase activation in TLR cascade                           |
| MPs            | Vif-mediated degradation of APOBEC3G                           |
| non-MPs        | SLC-mediated transmembrane transport                           |
| MPs            | Drug metabolism - cytochrome P450                              |
| MPs            | CLEC7A (Dectin-1) signaling                                    |
| MPs            | Metabolism of carbohydrates                                    |

|         |                                                                                                        |
|---------|--------------------------------------------------------------------------------------------------------|
| MPs     | MAP00480 Glutathione metabolism                                                                        |
| MPs     | Galactose metabolism                                                                                   |
| MPs     | Pentose Phosphate Pathway                                                                              |
| MPs     | De novo purine biosynthesis                                                                            |
| MPs     | Activation of the mRNA upon binding of the cap-binding complex and eIFs, and subsequent binding to 43S |
| non-MPs | Transmembrane transport of small molecules                                                             |
| MPs     | Hedgehog signaling pathway                                                                             |
| non-MPs | Neuronal System                                                                                        |
| MPs     | Histidine metabolism                                                                                   |
| MPs     | Stathmin and breast cancer resistance to antimicrotubule agents                                        |
| MPs     | Disease                                                                                                |
| MPs     | GTP hydrolysis and joining of the 60S ribosomal subunit                                                |
| MPs     | Translation                                                                                            |
| MPs     | Glycolysis                                                                                             |
| MPs     | Toll Like Receptor 10 (TLR10) Cascade                                                                  |
| MPs     | tyrosine metabolic                                                                                     |
| non-MPs | Olfactory transduction                                                                                 |
| MPs     | superpathway of conversion of glucose to acetyl CoA and entry into the TCA cycle                       |
| MPs     | Pyruvate Metabolism                                                                                    |
| MPs     | Regulation of mitotic cell cycle                                                                       |
| MPs     | Translation initiation complex formation                                                               |
| MPs     | CXCR4-mediated signaling events                                                                        |
| MPs     | Long-term potentiation                                                                                 |
| MPs     | Negative regulation of FGFR2 signaling                                                                 |
| non-MPs | Cytokine-cytokine receptor interaction                                                                 |
| MPs     | Pentose phosphate pathway                                                                              |
| MPs     | rRNA processing in the nucleus and cytosol                                                             |
| MPs     | Autodegradation of the E3 ubiquitin ligase COP1                                                        |
| MPs     | superpathway of methionine degradation                                                                 |
| MPs     | Tyrosine metabolism                                                                                    |
| MPs     | Amino acid synthesis and interconversion (transamination)                                              |
| MPs     | Downstream TCR signaling                                                                               |
| non-MPs | Olfactory transduction                                                                                 |
| MPs     | TCR signaling                                                                                          |
| MPs     | citrate cycle                                                                                          |
| MPs     | Links between Pyk2 and Map Kinases                                                                     |
| MPs     | Fructose and mannose metabolism                                                                        |
| MPs     | ErbB1 downstream signaling                                                                             |
| MPs     | Metabolism of polyamines                                                                               |
| MPs     | Neurotrophin signaling pathway                                                                         |
| MPs     | Alanine, aspartate and glutamate metabolism                                                            |
| MPs     | Regulation of APC/C activators between G1/S and early anaphase                                         |
| MPs     | superpathway of purine nucleotide salvage                                                              |
| MPs     | MAP00051 Fructose and mannose metabolism                                                               |

|         |                                                                                                          |
|---------|----------------------------------------------------------------------------------------------------------|
| MPs     | Retinol metabolism                                                                                       |
| MPs     | isoleucine degradation                                                                                   |
| MPs     | Glycine, serine and threonine metabolism                                                                 |
| MPs     | Degradation of AXIN                                                                                      |
| MPs     | Major pathway of rRNA processing in the nucleolus and cytosol                                            |
| MPs     | Arginine and proline metabolism                                                                          |
| MPs     | Regulation of ornithine decarboxylase (ODC)                                                              |
| MPs     | Neutrophil degranulation                                                                                 |
| MPs     | Valine, leucine and isoleucine degradation                                                               |
| MPs     | Central carbon metabolism in cancer                                                                      |
| MPs     | GLI3 is processed to GLI3R by the proteasome                                                             |
| MPs     | APC/C-mediated degradation of cell cycle proteins                                                        |
| MPs     | MAPK signaling pathway                                                                                   |
| MPs     | Glutathione metabolism                                                                                   |
| MPs     | Chaperonin-mediated protein folding                                                                      |
| MPs     | Beta3 adrenergic receptor signaling pathway                                                              |
| MPs     | Gluconeogenesis                                                                                          |
| MPs     | Pentose and glucuronate interconversions                                                                 |
| non-MPs | GPCR ligand binding                                                                                      |
| MPs     | CDK-mediated phosphorylation and removal of Cdc6                                                         |
| MPs     | Signaling by FGFR                                                                                        |
| non-MPs | Membrane Trafficking                                                                                     |
| MPs     | Metabolism of xenobiotics by cytochrome P450                                                             |
| MPs     | Cadherin signaling pathway                                                                               |
| MPs     | Citrate cycle (TCA cycle)                                                                                |
| MPs     | Hormone-sensitive lipase (HSL)-mediated triacylglycerol hydrolysis                                       |
| MPs     | Metabolism of xenobiotics by cytochrome P450                                                             |
| MPs     | Ubiquitin-dependent degradation of Cyclin D1                                                             |
| MPs     | superpathway of pyrimidine deoxyribonucleotides de novo biosynthesis                                     |
| MPs     | Generic Transcription Pathway                                                                            |
| MPs     | APC:Cdc20 mediated degradation of cell cycle proteins prior to satisfaction of the cell cycle checkpoint |
| MPs     | Toll Like Receptor TLR6:TLR2 Cascade                                                                     |
| MPs     | pyrimidine metabolic                                                                                     |
| MPs     | beta-Alanine metabolism                                                                                  |
| MPs     | Ribosome                                                                                                 |
| MPs     | Vpu mediated degradation of CD4                                                                          |
| MPs     | MAP00280 Valine leucine and isoleucine degradation                                                       |
| MPs     | pyruvate metabolic                                                                                       |
| MPs     | Alanine, aspartate and glutamate metabolism                                                              |
| MPs     | rRNA processing                                                                                          |
| MPs     | Cysteine and methionine metabolism                                                                       |
| MPs     | Chemokine signaling pathway                                                                              |
| MPs     | Glycine, serine and threonine metabolism                                                                 |
| MPs     | Glycolysis / Gluconeogenesis                                                                             |



|         |                                                                                                          |
|---------|----------------------------------------------------------------------------------------------------------|
| MPs     | Fructose and mannose metabolism                                                                          |
| MPs     | MyD88 dependent cascade initiated on endosome                                                            |
| MPs     | Fluid shear stress and atherosclerosis                                                                   |
| MPs     | tRNA Aminoacylation                                                                                      |
| MPs     | Histidine, lysine, phenylalanine, tyrosine, proline and tryptophan catabolism                            |
| MPs     | MAPK6/MAPK4 signaling                                                                                    |
| MPs     | Porphyrin and chlorophyll metabolism                                                                     |
| MPs     | Alpha-synuclein signaling                                                                                |
| MPs     | ErbB1 downstream signaling                                                                               |
| MPs     | Activated TLR4 signalling                                                                                |
| MPs     | Steroid hormone biosynthesis                                                                             |
| MPs     | MyD88:Mal cascade initiated on plasma membrane                                                           |
| MPs     | MAP00020 Citrate cycle TCA cycle                                                                         |
| MPs     | Genes encoding enzymes and their regulators involved in the remodeling of the extracellular matrix       |
| MPs     | APC/C:Cdh1 mediated degradation of Cdc20 and other APC/C:Cdh1 targeted proteins in late mitosis/early G1 |
| MPs     | Chemokine signaling pathway                                                                              |
| MPs     | Citrate cycle (TCA cycle)                                                                                |
| MPs     | Glucuronate pathway (uronate pathway)                                                                    |
| MPs     | MAP00640 Propanoate metabolism                                                                           |
| MPs     | Cytosolic tRNA aminoacylation                                                                            |
| MPs     | Ubiquitin-dependent degradation of Cyclin D                                                              |
| MPs     | Toll Like Receptor 7/8 (TLR7/8) Cascade                                                                  |
| MPs     | MAP00360 Phenylalanine metabolism                                                                        |
| MPs     | Glycolysis (Embden-Meyerhof pathway), glucose => pyruvate                                                |
| MPs     | Leigh Syndrome                                                                                           |
| MPs     | Drug metabolism - cytochrome P450                                                                        |
| MPs     | Hypoacetylaspartia                                                                                       |
| MPs     | Drug metabolism - other enzymes                                                                          |
| MPs     | Gluconeogenesis, oxaloacetate => fructose-6P                                                             |
| MPs     | Nonsense Mediated Decay (NMD) independent of the Exon Junction Complex (EJC)                             |
| MPs     | Phase II conjugation                                                                                     |
| MPs     | p53-Independent G1/S DNA damage checkpoint                                                               |
| MPs     | Influenza Infection                                                                                      |
| MPs     | MAP00251 Glutamate metabolism                                                                            |
| MPs     | Tyrosine metabolism                                                                                      |
| MPs     | Glycolysis, core module involving three-carbon compounds                                                 |
| MPs     | Angiotensin II mediated activation of JNK Pathway via Pyk2 dependent signaling                           |
| MPs     | butanoate metabolic                                                                                      |
| MPs     | Phagosome                                                                                                |
| MPs     | Trk receptor signaling mediated by the MAPK pathway                                                      |
| non-MPs | Signaling by GPCR                                                                                        |
| MPs     | Metabolic pathways                                                                                       |

|         |                                                                     |
|---------|---------------------------------------------------------------------|
| MPs     | Butanoate metabolism                                                |
| non-MPs | Cytokine-cytokine receptor interaction                              |
| MPs     | Nitric Oxide Signaling Pathway                                      |
| MPs     | ABC transporter disorders                                           |
| MPs     | Formation of the ternary complex, and subsequently, the 43S complex |
| MPs     | Epstein-Barr virus infection                                        |
| MPs     | Selenoamino acid metabolism                                         |
| MPs     | Pentose and glucuronate interconversions                            |
| MPs     | Phenylalanine metabolism                                            |
| MPs     | Regulation of Apoptosis                                             |
| MPs     | Cysteine and methionine metabolism                                  |
| MPs     | Porphyrin and chlorophyll metabolism                                |
| MPs     | Proteasome                                                          |
| MPs     | Gluconeogenesis                                                     |
| MPs     | Amino sugar and nucleotide sugar metabolism                         |
| MPs     | Bioactive Peptide Induced Signaling Pathway                         |
| MPs     | Fatty acid degradation                                              |
| MPs     | Butanoate metabolism                                                |
| MPs     | arginine and proline metabolic                                      |
| MPs     | C-type lectin receptors (CLRs)                                      |
| MPs     | 2-Hydroxyglutric Aciduria (D And L Form)                            |
| MPs     | pentose phosphate                                                   |
| MPs     | Purine metabolism                                                   |
| MPs     | Mitochondrial tRNA aminoacylation                                   |
| MPs     | p53-Independent DNA Damage Response                                 |
| MPs     | Carbon metabolism                                                   |
| MPs     | Fatty acid metabolism                                               |
| MPs     | Drug metabolism - other enzymes                                     |
| MPs     | ER-Phagosome pathway                                                |
| MPs     | valine, leucine and isoleucine degradation                          |
| MPs     | Ascorbate and aldarate metabolism                                   |
| MPs     | Toll Like Receptor 2 (TLR2) Cascade                                 |
| MPs     | TRIF-mediated TLR3/TLR4 signaling                                   |
| non-MPs | Neuroactive ligand-receptor interaction                             |
| MPs     | Eukaryotic Translation Elongation                                   |
| MPs     | Guanine ribonucleotide biosynthesis IMP => GDP,GTP                  |
| MPs     | Alpha-synuclein signaling                                           |
| MPs     | Biological oxidations                                               |
| MPs     | ABC-family proteins mediated transport                              |
| MPs     | Glutathione metabolism                                              |
| MPs     | MAP00410 beta Alanine metabolism                                    |
| MPs     | glycolysis pathway                                                  |
| MPs     | Steroid hormone biosynthesis                                        |
| MPs     | Phenylalanine metabolism                                            |
| MPs     | Thromboxane A2 receptor signaling                                   |

|         |                                                                                                                           |
|---------|---------------------------------------------------------------------------------------------------------------------------|
| MPs     | Galactose metabolism                                                                                                      |
| MPs     | Starch and sucrose metabolism                                                                                             |
| MPs     | Amino sugar and nucleotide sugar metabolism                                                                               |
| MPs     | SRP-dependent cotranslational protein targeting to membrane                                                               |
| MPs     | MAP00970 Aminoacyl tRNA biosynthesis                                                                                      |
| MPs     | Pentose phosphate pathway                                                                                                 |
| MPs     | MAP00340 Histidine metabolism                                                                                             |
| MPs     | PPAR signaling pathway                                                                                                    |
| MPs     | SCF-beta-TrCP mediated degradation of Emi1                                                                                |
| MPs     | glycolysis/gluconeogenesis                                                                                                |
| MPs     | Retinol metabolism                                                                                                        |
| MPs     | Signaling by FGFR3                                                                                                        |
| MPs     | Autophagy - animal                                                                                                        |
| MPs     | Autodegradation of Cdh1 by Cdh1:APC/C                                                                                     |
| MPs     | Mitochondrial translation                                                                                                 |
| MPs     | Aminoacyl-tRNA biosynthesis                                                                                               |
| MPs     | Glucuronidation                                                                                                           |
| MPs     | MAP00650 Butanoate metabolism                                                                                             |
| non-MPs | GPCR downstream signaling                                                                                                 |
| MPs     | Pyruvate metabolism                                                                                                       |
| MPs     | Ensemble of genes encoding ECM-associated proteins including ECM-affiliated proteins, ECM regulators and secreted factors |
| MPs     | Purine ribonucleoside monophosphate biosynthesis                                                                          |
| MPs     | Insulin signaling pathway                                                                                                 |
| MPs     | 5-Hydroxytryptamine degradation                                                                                           |
| MPs     | Eukaryotic Translation Initiation                                                                                         |
| MPs     | Cooperation of Prefoldin and TriC/CCT in actin and tubulin folding                                                        |
| MPs     | beta-Alanine metabolism                                                                                                   |
| MPs     | leucine degradation                                                                                                       |
| MPs     | Neurotrophin signaling pathway                                                                                            |
| MPs     | glycolysis                                                                                                                |
| MPs     | Ethanol oxidation                                                                                                         |
| MPs     | fructose and mannose metabolic                                                                                            |
| MPs     | Arginine and proline metabolism                                                                                           |
| MPs     | MAP00620 Pyruvate metabolism                                                                                              |
| MPs     | Beta-catenin independent WNT signaling                                                                                    |
| MPs     | Protein folding                                                                                                           |
| MPs     | APC/C:Cdc20 mediated degradation of mitotic proteins                                                                      |
| MPs     | MAP00260 Glycine serine and threonine metabolism                                                                          |
| non-MPs | Neuroactive ligand-receptor interaction                                                                                   |
| MPs     | Mitochondrial translation initiation                                                                                      |
| MPs     | Tetrahydrobiopterin (BH4) synthesis, recycling, salvage and regulation                                                    |
| MPs     | gamma-linolenate biosynthesis                                                                                             |
| MPs     | Long-term potentiation                                                                                                    |
| MPs     | Genes related to regulation of the actin cytoskeleton                                                                     |
| MPs     | Arachidonic acid metabolism                                                                                               |

|         |                                                                              |
|---------|------------------------------------------------------------------------------|
| MPs     | BCR Signaling Pathway                                                        |
| MPs     | Leucine degradation, leucine => acetoacetate + acetyl-CoA                    |
| MPs     | MAP00710 Carbon fixation                                                     |
| MPs     | Metabolism of water-soluble vitamins and cofactors                           |
| MPs     | Propanoate metabolism                                                        |
| MPs     | Toll Like Receptor 5 (TLR5) Cascade                                          |
| MPs     | CXCR4-mediated signaling events                                              |
| MPs     | Innate Immune System                                                         |
| MPs     | T Cell Receptor Signaling Pathway                                            |
| MPs     | Purine metabolism                                                            |
| MPs     | Pentose phosphate pathway (Pentose phosphate cycle)                          |
| MPs     | Propanoate metabolism                                                        |
| MPs     | Pyrimidine metabolism                                                        |
| MPs     | Activation of APC/C and APC/C:Cdc20 mediated degradation of mitotic proteins |
| MPs     | Ribosome                                                                     |
| MPs     | Regulation of activated PAK-2p34 by proteasome mediated degradation          |
| MPs     | Pyruvate metabolism                                                          |
| MPs     | Toll Like Receptor TLR1:TLR2 Cascade                                         |
| MPs     | Insulin signaling pathway                                                    |
| MPs     | Influenza Life Cycle                                                         |
| MPs     | fatty acid beta-oxidation (peroxisome)                                       |
| MPs     | Negative regulation of FGFR3 signaling                                       |
| MPs     | FBXL7 down-regulates AURKA during mitotic entry and in early mitosis         |
| MPs     | Regulation of mRNA stability by proteins that bind AU-rich elements          |
| MPs     | L13a-mediated translational silencing of Ceruloplasmin expression            |
| MPs     | Chemical carcinogenesis                                                      |
| MPs     | Degradation of GLI1 by the proteasome                                        |
| MPs     | Viral mRNA Translation                                                       |
| MPs     | Activation of Matrix Metalloproteinases                                      |
| MPs     | NIK-->noncanonical NF-kB signaling                                           |
| MPs     | Glycine, Serine and Threonine Metabolism                                     |
| MPs     | Branched-chain amino acid catabolism                                         |
| MPs     | MyD88 cascade initiated on plasma membrane                                   |
| MPs     | MAP00010 Glycolysis Gluconeogenesis                                          |
| MPs     | Purine metabolism                                                            |
| MPs     | Degradation of GLI2 by the proteasome                                        |
| MPs     | MAP00350 Tyrosine metabolism                                                 |
| MPs     | MAP00380 Tryptophan metabolism                                               |
| MPs     | Valine, leucine and isoleucine degradation                                   |
| MPs     | Valine, Leucine and Isoleucine Degradation                                   |
| MPs     | Parkinson disease                                                            |
| non-MPs | Vesicle-mediated transport                                                   |
| MPs     | Metabolism of nucleotides                                                    |
| MPs     | Cdc20:Phospho-APC/C mediated degradation of Cyclin A                         |

|         |                                                                              |
|---------|------------------------------------------------------------------------------|
| MPs     | Nonsense Mediated Decay (NMD) enhanced by the Exon Junction Complex (EJC)    |
| MPs     | Toll Like Receptor 3 (TLR3) Cascade                                          |
| MPs     | starch and sucrose metabolic                                                 |
| MPs     | Ubiquitin Mediated Degradation of Phosphorylated Cdc25A                      |
| MPs     | Ras Pathway                                                                  |
| MPs     | MAP00252 Alanine and aspartate metabolism                                    |
| MPs     | Selenocysteine synthesis                                                     |
| non-MPs | Class A/1 (Rhodopsin-like receptors)                                         |
| MPs     | MAP00030 Pentose phosphate                                                   |
| MPs     | Ascorbate and aldarate metabolism                                            |
| MPs     | Toll Like Receptor 9 (TLR9) Cascade                                          |
| non-MPs | Olfactory Signaling Pathway                                                  |
| MPs     | Peptide chain elongation                                                     |
| MPs     | Formation of a pool of free 40S subunits                                     |
| MPs     | Glyoxylate and dicarboxylate metabolism                                      |
| MPs     | Mitochondrial translation termination                                        |
| MPs     | Ribosomal scanning and start codon recognition                               |
| MPs     | MAPK signaling pathway                                                       |
| MPs     | 2-Oxocarboxylic acid metabolism                                              |
| MPs     | MAP00071 Fatty acid metabolism                                               |
| MPs     | Thromboxane A2 receptor signaling                                            |
| MPs     | Infectious disease                                                           |
| MPs     | PPAR signaling pathway                                                       |
| MPs     | MAP00330 Arginine and proline metabolism                                     |
| MPs     | Wnt signaling pathway                                                        |
| MPs     | MyD88-independent TLR3/TLR4 cascade                                          |
| MPs     | GnRH signaling pathway                                                       |
| MPs     | TRAF6 mediated induction of NFkB and MAP kinases upon TLR7/8 or 9 activation |

**Table S9.** The gene family cluster of predicted MPs and predicted non-MPs.

| MPs or non-MPs | Gene family cluster                                                   |
|----------------|-----------------------------------------------------------------------|
| MPs            | Ring finger proteins WD repeat domain containing                      |
| MPs            | Aminoacyl tRNA synthetases, Class I                                   |
| MPs            | Argonaute/PIWI family                                                 |
| MPs            | Fibrinogen C domain containing Fibronectin type III domain containing |
| MPs            | Ankyrin repeat domain containing BRCA1 B complex                      |
| MPs            | Annexins                                                              |
| MPs            | Proteasome                                                            |
| MPs            | Ubiquitin conjugating enzymes E2                                      |
| MPs            | Sulfotransferases, cytosolic                                          |
| MPs            | UDP glucuronosyltransferases                                          |
| MPs            | Polypeptide N-acetylgalactosaminyltransferases                        |

|     |                                                                                        |
|-----|----------------------------------------------------------------------------------------|
| MPs | Mitogen-activated protein kinase kinases                                               |
| MPs | DEAD-box helicases                                                                     |
| MPs | Protein phosphatase catalytic subunits                                                 |
| MPs | Cadherin related                                                                       |
| MPs | DNAJ (HSP40) heat shock proteins                                                       |
| MPs | Cyclin dependent kinases                                                               |
| MPs | Histocompatibility complex C1-set domain containing                                    |
| MPs | ARF GTPase family                                                                      |
| MPs | CD molecules Complement system Integrin alpha subunits                                 |
| MPs | Tubulins                                                                               |
| MPs | S ribosomal proteins                                                                   |
| MPs | Aminoacyl tRNA synthetases, Class II                                                   |
| MPs | Matrix metalloproteinases                                                              |
| MPs | WD repeat domain containing F-box and WD repeat domain containing                      |
| MPs | WD repeat domain containing Coronins                                                   |
| MPs | Kelch like BTB domain containing                                                       |
| MPs | Heat shock 70kDa proteins                                                              |
| MPs | Transglutaminases                                                                      |
| MPs | CD molecules Type II classical cadherins                                               |
| MPs | Methyltransferase like                                                                 |
| MPs | Non-clustered protocadherins                                                           |
| MPs | Proteases, serine                                                                      |
| MPs | X-linked mental retardation Mitogen-activated protein kinase-activated protein kinases |
| MPs | S100 calcium binding proteins EF-hand domain containing                                |
| MPs | Aldehyde dehydrogenases                                                                |
| MPs | Rho family GTPases                                                                     |
| MPs | Glutathione S-transferases                                                             |
| MPs | Clustered protocadherins                                                               |
| MPs | Mitochondrial ribosomal proteins                                                       |
| MPs | Short chain dehydrogenase/reductase superfamily                                        |
| MPs | RAS type GTPase family                                                                 |
| MPs | Aldo-keto reductases                                                                   |
| MPs | Wnt family                                                                             |
| MPs | AAA ATPases                                                                            |
| MPs | Zinc fingers C2H2-type BTB domain containing                                           |
| MPs | Endogenous ligands                                                                     |
| MPs | Mitogen-activated protein kinases                                                      |
| MPs | Ribonuclease A family                                                                  |
| MPs | Kallikreins Proteases, serine                                                          |
| MPs | EF-hand domain containing                                                              |
| MPs | RAB, member RAS oncogene GTPases                                                       |
| MPs | C1q and TNF related                                                                    |
| MPs | Serine peptidase inhibitors, Kazal type                                                |
| MPs | Myosin light chains EF-hand domain containing                                          |

|         |                                                                                                      |
|---------|------------------------------------------------------------------------------------------------------|
| MPs     | FKBP prolyl isomerases                                                                               |
| MPs     | Acyl-CoA dehydrogenase family                                                                        |
| MPs     | Chaperonins                                                                                          |
| MPs     | Fatty acid binding protein family                                                                    |
| MPs     | NME/NM23 family                                                                                      |
| MPs     | Serpin peptidase inhibitors                                                                          |
| MPs     | Acyl-CoA synthetase family                                                                           |
| MPs     | Cathepsins                                                                                           |
| MPs     | Beta-gamma crystallins                                                                               |
| MPs     | Lysozymes, c-type                                                                                    |
| MPs     | Tetratricopeptide repeat domain containing Cyclophilin peptidylprolyl isomerases                     |
| MPs     | Alcohol dehydrogenases                                                                               |
| MPs     | Chemokine ligands Endogenous ligands                                                                 |
| MPs     | L ribosomal proteins                                                                                 |
| MPs     | PRD class homeoboxes and pseudogenes Paired boxes                                                    |
| MPs     | Fibronectin type III domain containing Sterile alpha motif domain containing EPH receptors           |
| non-MPs | HOXL subclass homeoboxes                                                                             |
| non-MPs | Ring finger proteins Tripartite motif containing                                                     |
| non-MPs | Zinc fingers FYVE-type Pleckstrin homology domain containing Rho guanine nucleotide exchange factors |
| non-MPs | Sorting nexins                                                                                       |
| non-MPs | Myotubularins Phosphoinositide phosphatases                                                          |
| non-MPs | Keratins, type I                                                                                     |
| non-MPs | Solute carriers                                                                                      |
| non-MPs | MAGE family                                                                                          |
| non-MPs | Gamma-aminobutyric acid type A receptor subunits                                                     |
| non-MPs | Fibronectin type III domain containing Interleukin receptors                                         |
| non-MPs | Ubiquitin specific peptidases                                                                        |
| non-MPs | RNA binding motif containing                                                                         |
| non-MPs | Collagens                                                                                            |
| non-MPs | Fibronectin type III domain containing I-set domain containing Immunoglobulin like domain containing |
| non-MPs | Immunoglobulin like domain containing Semaphorins                                                    |
| non-MPs | Transient receptor potential cation channels Ankyrin repeat domain containing                        |
| non-MPs | Claudins                                                                                             |
| non-MPs | CD molecules Tumor necrosis factor superfamily                                                       |
| non-MPs | G-patch domain containing RNA binding motif containing                                               |
| non-MPs | Nuclear hormone receptors                                                                            |
| non-MPs | Tumor necrosis factor receptor superfamily                                                           |
| non-MPs | NLR family Pyrin domain containing                                                                   |
| non-MPs | Armadillo repeat containing Importins                                                                |
| non-MPs | A-kinase anchoring proteins                                                                          |
| non-MPs | Interleukins PDZ domain containing                                                                   |

|         |                                                                                                                                |
|---------|--------------------------------------------------------------------------------------------------------------------------------|
| non-MPs | Phosphatidylinositol glycan anchor biosynthesis                                                                                |
| non-MPs | ETS transcription factor family                                                                                                |
| non-MPs | Basic helix-loop-helix proteins                                                                                                |
| non-MPs | AT-rich interaction domain containing                                                                                          |
| non-MPs | Atypical dual specificity phosphatases Phosphoinositide phosphatases                                                           |
| non-MPs | Regulators of G-protein signaling                                                                                              |
| non-MPs | Fucosyltransferases                                                                                                            |
| non-MPs | Armadillo repeat containing                                                                                                    |
| non-MPs | G protein-coupled receptors, Class A orphans                                                                                   |
| non-MPs | Cholinergic receptors nicotinic subunits                                                                                       |
| non-MPs | Rho GTPase activating proteins                                                                                                 |
| non-MPs | LY6/PLAUR domain containing                                                                                                    |
| non-MPs | Calcium voltage-gated channel subunits                                                                                         |
| non-MPs | Fibronectin type III domain containing Sterile alpha motif domain containing EPH receptors                                     |
| non-MPs | Tetraspanins                                                                                                                   |
| non-MPs | Forkhead boxes                                                                                                                 |
| non-MPs | Potassium two pore domain channel subfamily K                                                                                  |
| non-MPs | Receptor Tyrosine Kinases Fibronectin type III domain containing V-set domain containing Immunoglobulin like domain containing |
| non-MPs | Zinc fingers FYVE-type                                                                                                         |
| non-MPs | C2 domain containing Calpains                                                                                                  |
| non-MPs | Endogenous ligands                                                                                                             |
| non-MPs | F-BAR domain containing                                                                                                        |
| non-MPs | Zinc fingers C2HC-type PHD finger proteins Lysine acetyltransferases                                                           |
| non-MPs | Kinesins Protein phosphatase 1 regulatory subunits                                                                             |
| non-MPs | Ankyrin repeat domain containing BRCA1 B complex                                                                               |
| non-MPs | Lysine demethylases                                                                                                            |
| non-MPs | Immunoglobulin like domain containing Interleukin receptors TIR domain containing                                              |
| non-MPs | Anaphase promoting complex  Tetratricopeptide repeat domain containing                                                         |
| non-MPs | Kelch like BTB domain containing                                                                                               |
| non-MPs | Late cornified envelope proteins                                                                                               |
| non-MPs | Minor histocompatibility antigens FERM domain containing                                                                       |
| non-MPs | Ring finger proteins Tripartite motif containing                                                                               |
| non-MPs | GATA zinc finger domain containing Myb/SANT domain containing                                                                  |
| non-MPs | Membrane associated guanylate kinases PDZ domain containing                                                                    |
| non-MPs | DENN/MADD domain containing Pleckstrin homology domain containing Myotubularins                                                |
| non-MPs | Zinc fingers MYND-type                                                                                                         |
| non-MPs | Potassium voltage-gated channels                                                                                               |
| non-MPs | Basic leucine zipper proteins                                                                                                  |
| non-MPs | Rho guanine nucleotide exchange factors                                                                                        |
| non-MPs | Zinc fingers CCCH-type RNA binding motif containing                                                                            |
| non-MPs | Sulfotransferases, membrane bound                                                                                              |
| non-MPs | Zinc fingers DHHC-type                                                                                                         |



|         |                                                                                                                              |
|---------|------------------------------------------------------------------------------------------------------------------------------|
| non-MPs | F-box and leucine rich repeat proteins                                                                                       |
| non-MPs | Receptor Tyrosine Kinases CD molecules V-set domain containing I-set domain containing Immunoglobulin like domain containing |
| non-MPs | Apolipoproteins Sushi domain containing                                                                                      |
| non-MPs | Protein phosphatase 1 regulatory subunits                                                                                    |
| non-MPs | Keratins, type II                                                                                                            |

## References

- [1]. Hochreiter, S. and Schmidhuber, J. (1997). Long short-term memory. *Neural Computation* 9, 1735–1780.
- [2]. Vincent, P., Larochelle, H., Lajoie, I., Bengio, Y., and Manzagol, P. A. (2010). Stacked denoising autoencoders: Learning useful representations in a deep network with a local denoising griterion. *Journal of Machine Learning Research* 11, 3371–3408.
- [3]. Joanna S Amberger, Carol A Bocchini, François Schiettecatte, Alan F Scott, Ada Hamosh. (2014). OMIM.org: Online Mendelian Inheritance in Man (OMIM®), an online catalog of human genes and genetic disorders. *Nucleic Acids Res* 43. D789-98.
- [4]. Kim, S., Thiessen, E. E., Bolton, and Chen, J. (2014). Activities at the universal protein resource (uniprot). *Nucleic Acids Research*.
- [5]. Vivek Kaimal, Eric E Bardes, Scott C Tabar, Anil G Jegga, Bruce J Aronow. (2010). ToppCluster: a multiple gene list feature analyzer for comparative enrichment clustering and network-based dissection of biological systems. *Nucleic Acids Res* 38. W96-102.
